# Supplementary material for: Development and application of loop-mediated isothermal amplification for detection of the F167Y mutation of carbendazim-resistant isolates in Fusarium graminearum
Source: PubMed Central journal article supplement (PMC4235284; doi:10.1038/srep07094), 2014-11-18
Supplement: srep07094-s1.pdf [file srep07094-s1.pdf]

# Development and application of loop-mediated isothermal amplification for detection of the F167Y mutation of benzimidazole-resistant isolates in *Fusarium graminearum*

Yabing Duan, Xiaoke Zhang, Changyan Ge, Yong Wang, Junhong Cao, Xiaojing Jia, Jianxin Wang & Mingguo Zhou  
College of Plant Protection, Nanjing Agricultural University, Nanjing, 210095, China

Correspondence and requests for materials should be addressed to M. G. Z. (mgzhou@njau.edu.cn)

## Figure legend

Fig. S1 Sensitivity of LAMP vs. conventional PCR for detection of the F167Y mutation. (A) Gel electrophoresis of LAMP. (B) Gel electrophoresis of PCR. Concentrations of template DNA ( $\text{ng } \mu\text{L}^{-1}$ ) per reaction in (A), and (B) were: 1= $10^0$ , 2= $10^{-1}$ , 3= $10^{-2}$ , 4= $10^{-3}$ , 5= $10^{-4}$ , 6= $10^{-5}$ , and 7= $10^{-6}$ . In (A) and (B), M indicates 100-bp, and 250-bp ladder, respectively.

Figure S1

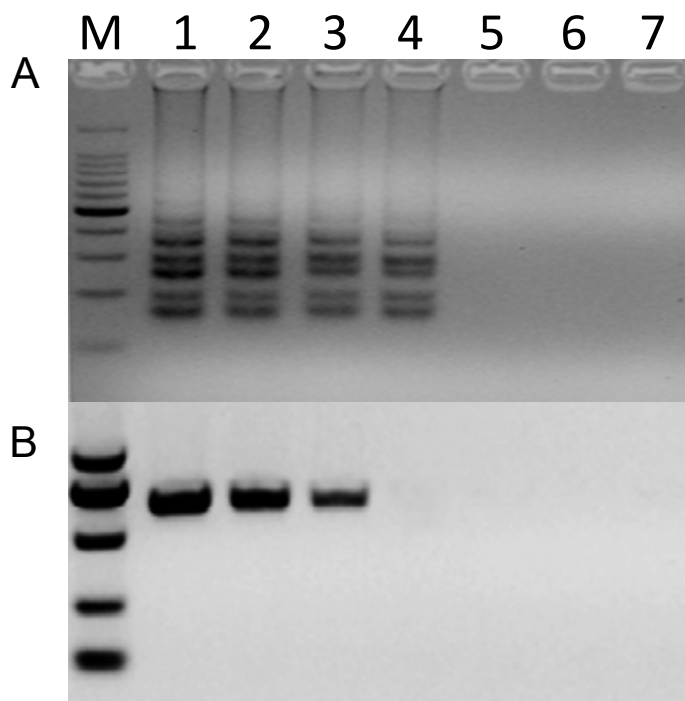

## Supplementary Tables

**Table S1. Information of the primers used in this study.**

**Table S2. *Fusarium graminearum* isolates used in specificity test of LAMP.**

**Table S3. *Fusarium graminearum* isolates used in repeatability test of LAMP**

### Tables

**Table S1**

| Primers    | Sequence (5'-3') <sup>a</sup>                        | Use                                                                                              |
|------------|------------------------------------------------------|--------------------------------------------------------------------------------------------------|
| F3         | TTCCAGCTGACGCACTCT                                   | Forward outer primer for LAMP                                                                    |
| B3         | ACAGAAGGTCTCGTCAGAGT                                 | Backward outer primer for LAMP                                                                   |
| FIP        | TGCGATCGGGGAACCTCTCG-TGGTACCGGTTCCGGTATG             | Forward inner primer for LAMP                                                                    |
| BIP1       | CT <b>A</b> TTCCGTTATGCCCTCGCCC-ACGAGCTGGTTCAGAGACAA | Backward inner primers to distinguish the <i>Fusarium graminearum</i> genotypes (F167Y) for LAMP |
| BIP2       | T <b>A</b> TTCCGTTATGCCCTCGCCC-ACGAGCTGGTTCAGAGACAA  |                                                                                                  |
| BIP3       | <b>A</b> TTCCGTTATGCCCTCGCCC-ACGAGCTGGTTCAGAGACAA    |                                                                                                  |
| BIP4       | GA <b>A</b> TTCCGTTATGCCCTCGCCC-ACGAGCTGGTTCAGAGACAA |                                                                                                  |
| BIP5       | A <b>A</b> TTCCGTTATGCCCTCGCCC-ACGAGCTGGTTCAGAGACAA  |                                                                                                  |
| BIP6       | AA <b>A</b> TTCCGTTATGCCCTCGCCC-ACGAGCTGGTTCAGAGACAA |                                                                                                  |
| BIP7       | <b>A</b> AAACCGTTATGCCCTCGCCC-ACGAGCTGGTTCAGAGACAA   |                                                                                                  |
| Fgbeta637F | TCAGGGCGGCAACGACAAGTA                                | To amplify the partial fragments (637 bp) of the                                                 |
| Fgbeta637R | GTGAAGTCGGGGGAACGGAAT                                | $\beta_2$ -tubulin gene containing the F167Y position.                                           |

<sup>a</sup> Nucleotides in frames are modified from the sequence of the  $\beta_2$ -tubulin gene in the sensitive biotype and the resistant biotype. Nucleotides in bold are mismatches manually added specifically to distinguish *F. graminearum* genotypes (F167Y).

**Table S2**

| Isolates | Genotype description                               | Origin                   | Resistance phenotype <sup>a</sup> | LAMP <sup>b</sup> |
|----------|----------------------------------------------------|--------------------------|-----------------------------------|-------------------|
| R9       | Mutation at codon 167 of $\beta_2$ tubulin (F167Y) | Zhejiang province, China | MBC <sup>R</sup>                  | +                 |
| 2021     | Wild type                                          | Zhejiang province, China | MBC <sup>S</sup>                  | —                 |
| Y50C     | Mutation at codon 50 of $\beta_2$ tubulin (Y50C)   | In our Lab.              | MBC <sup>R</sup>                  | —                 |
| J-2      | Mutation at codon 198 of $\beta_2$ tubulin (E198K) | Anhui province, China    | MBC <sup>R</sup>                  | —                 |
| ZJ80     | Mutation at codon 198 of $\beta_2$ tubulin (E198Q) | Anhui province, China    | MBC <sup>R</sup>                  | —                 |
| NT-7     | Mutation at codon 200 of $\beta_2$ tubulin (F200Y) | Hubei province, China    | MBC <sup>R</sup>                  | —                 |

<sup>a</sup> MBC<sup>S</sup> and MBC<sup>R</sup> indicate that the isolate is sensitive and resistant to carbendazim, respectively.

<sup>b</sup> ‘+’ and ‘—’ represent positive and negative results, respectively.

**Table S3**

| Order | Isolates | Genotype description                               | Origin                   | Resistance phenotype <sup>a</sup> | LAMP <sup>b</sup> |
|-------|----------|----------------------------------------------------|--------------------------|-----------------------------------|-------------------|
| 1     | YZ1001   | Mutation at codon 167 of $\beta_2$ tubulin (F167Y) | Jiangsu province, China  | MBC <sup>R</sup>                  | +                 |
| 2     | CZ1001   | Mutation at codon 167 of $\beta_2$ tubulin (F167Y) | Jiangsu province, China  | MBC <sup>R</sup>                  | +                 |
| 3     | LYG1209  | Mutation at codon 167 of $\beta_2$ tubulin (F167Y) | Jiangsu province, China  | MBC <sup>R</sup>                  | +                 |
| 4     | TZ1205   | Mutation at codon 167 of $\beta_2$ tubulin (F167Y) | Jiangsu province, China  | MBC <sup>R</sup>                  | +                 |
| 5     | HA1008   | Mutation at codon 167 of $\beta_2$ tubulin (F167Y) | Jiangsu province, China  | MBC <sup>R</sup>                  | +                 |
| 6     | WX1002   | Mutation at codon 167 of $\beta_2$ tubulin (F167Y) | Jiangsu province, China  | MBC <sup>R</sup>                  | +                 |
| 7     | YC1011   | Mutation at codon 167 of $\beta_2$ tubulin (F167Y) | Jiangsu province, China  | MBC <sup>R</sup>                  | +                 |
| 8     | JH1408   | Mutation at codon 167 of $\beta_2$ tubulin (F167Y) | Jiangsu province, China  | MBC <sup>R</sup>                  | +                 |
| 9     | JH1411   | Mutation at codon 167 of $\beta_2$ tubulin (F167Y) | Jiangsu province, China  | MBC <sup>R</sup>                  | +                 |
| 10    | JH1463   | Mutation at codon 167 of $\beta_2$ tubulin (F167Y) | Jiangsu province, China  | MBC <sup>R</sup>                  | +                 |
| 11    | XS1403   | Mutation at codon 167 of $\beta_2$ tubulin (F167Y) | Jiangsu province, China  | MBC <sup>R</sup>                  | +                 |
| 12    | XS1433   | Mutation at codon 167 of $\beta_2$ tubulin (F167Y) | Jiangsu province, China  | MBC <sup>R</sup>                  | +                 |
| 13    | XS1443   | Mutation at codon 167 of $\beta_2$ tubulin (F167Y) | Jiangsu province, China  | MBC <sup>R</sup>                  | +                 |
| 14    | XS1451   | Mutation at codon 167 of $\beta_2$ tubulin (F167Y) | Jiangsu province, China  | MBC <sup>R</sup>                  | +                 |
| 15    | CHZ1013  | Mutation at codon 167 of $\beta_2$ tubulin (F167Y) | Anhui province, China    | MBC <sup>R</sup>                  | +                 |
| 16    | SUZ1003  | Mutation at codon 167 of $\beta_2$ tubulin (F167Y) | Anhui province, China    | MBC <sup>R</sup>                  | +                 |
| 17    | LJ1403   | Mutation at codon 167 of $\beta_2$ tubulin (F167Y) | Anhui province, China    | MBC <sup>R</sup>                  | +                 |
| 18    | LJ1411   | Mutation at codon 167 of $\beta_2$ tubulin (F167Y) | Anhui province, China    | MBC <sup>R</sup>                  | +                 |
| 19    | SC1103   | Mutation at codon 167 of $\beta_2$ tubulin (F167Y) | Sichuan province, China  | MBC <sup>R</sup>                  | +                 |
| 20    | SC1105   | Mutation at codon 167 of $\beta_2$ tubulin (F167Y) | Sichuan province, China  | MBC <sup>R</sup>                  | +                 |
| 21    | SC1108   | Mutation at codon 167 of $\beta_2$ tubulin (F167Y) | Sichuan province, China  | MBC <sup>R</sup>                  | +                 |
| 22    | HB1002   | Mutation at codon 167 of $\beta_2$ tubulin (F167Y) | Hubei province, China    | MBC <sup>R</sup>                  | +                 |
| 23    | HB1003   | Mutation at codon 167 of $\beta_2$ tubulin (F167Y) | Hubei province, China    | MBC <sup>R</sup>                  | +                 |
| 24    | LY1102   | Mutation at codon 167 of $\beta_2$ tubulin (F167Y) | Shandong province, China | MBC <sup>R</sup>                  | +                 |
| 25    | LY1108   | Mutation at codon 167 of $\beta_2$ tubulin (F167Y) | Shandong province, China | MBC <sup>R</sup>                  | +                 |
| 26    | LY1110   | Mutation at codon 167 of $\beta_2$ tubulin (F167Y) | Shandong province, China | MBC <sup>R</sup>                  | +                 |
| 27    | LH1201   | Mutation at codon 167 of $\beta_2$ tubulin (F167Y) | Henan province, China    | MBC <sup>R</sup>                  | +                 |
| 28    | LH1001   | Mutation at codon 167 of $\beta_2$ tubulin (F167Y) | Henan province, China    | MBC <sup>R</sup>                  | +                 |

<sup>a</sup> MBC<sup>R</sup> indicate that the isolate is sensitive and resistant to carbendazim, respectively.

<sup>b</sup> ‘+’ represent positive results.
